# Supplementary material for: BODIPY dyes functionalized with 2-(2-dimethylaminophenyl)ethanol moieties as selective OFF–ON fluorescent chemodosimeters for the nerve agent mimics DCNP and DFP
Source: Royal Society of Chemistry journal article supplement (doi:10.1039/c4ra00710g), 2014-01-01
Supplement: c4ra00710g1.pdf [file c4ra00710g1.pdf]

## BODIPY dyes functionalized with 2-(2-dimethylaminophenyl)ethanol moieties as sensitive and selective fluorescent chemodosimeters for the nervous agents mimics DCNP and DFP

R. Gotor<sup>a</sup>, P. Gaviña<sup>a</sup>, Luis E. Ochando<sup>b</sup>, K. Chulvi<sup>a</sup>, A. Lorente<sup>a</sup>, R. Martínez-Máñez<sup>c</sup> and A. M. Costero<sup>a\*</sup>

### Supplementary Information

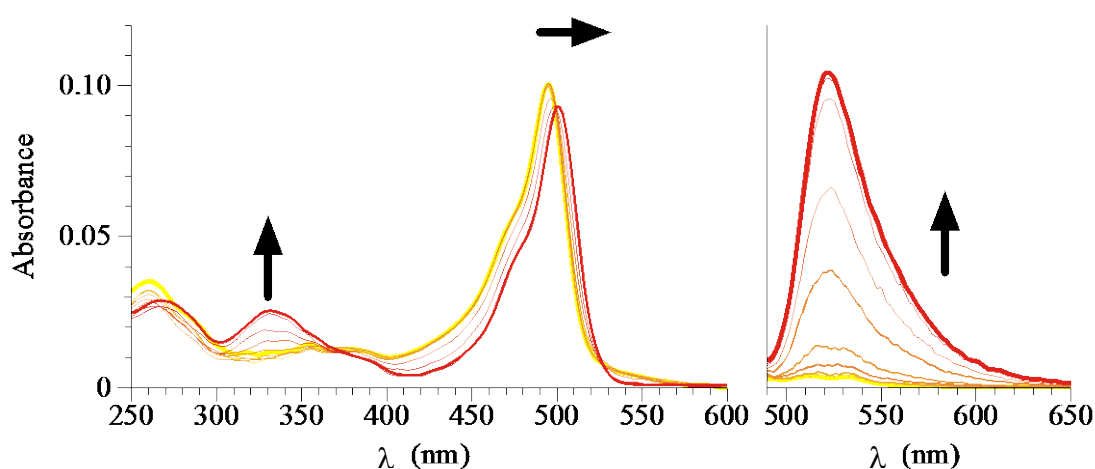

**Figure S-1.** UV-vis (left) and emission (right,  $\lambda_{\text{exc}}=480$  nm) spectrum of compound **1** ( $1 \times 10^{-6}$  M in MeCN) titrated with DCNP (from 100  $\mu$ M to 20 mM) Yellow: free ligand, red: ligand+DCNP 20 mM

### Crystallographic Data Compound 1:

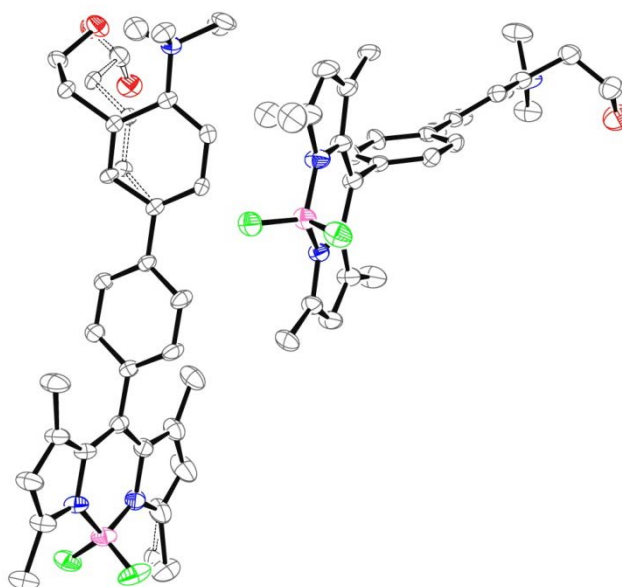

**Figure S-2.** Asymmetric unit of structure of compound **2**, including disorders atoms. Hydrogen atoms are omitted for clarity.

**Table S1.** Crystal data and structure refinement for compound **2**.

---

|                                   |                                                                                             |
|-----------------------------------|---------------------------------------------------------------------------------------------|
| Empirical formula                 | C <sub>58</sub> H <sub>47</sub> B <sub>2</sub> F <sub>4</sub> N <sub>6</sub> O <sub>2</sub> |
| Formula weight                    | 957.64                                                                                      |
| Temperature                       | 120(2) K                                                                                    |
| Wavelength                        | 0.71073 Å                                                                                   |
| Crystal system, space group       | Monoclinic, P2 <sub>1</sub> /c                                                              |
| Unit cell dimensions              | a = 15.7361(3) Å<br>b = 16.6946(4) Å β = 103.168(3)°<br>c = 20.2283(7) Å                    |
| Volume                            | 5174.4(2) Å <sup>3</sup>                                                                    |
| Z, Calculated density             | 4, 1.229 mg/m <sup>3</sup>                                                                  |
| Absorption coefficient            | 0.085 mm <sup>-1</sup>                                                                      |
| F(000)                            | 1996                                                                                        |
| Crystal size                      | 0.17 x 0.11 x 0.09 mm                                                                       |
| θ range for data collection       | 2.86 to 25.00°                                                                              |
| Limiting indices                  | -18<=h<=12, -19<=k<=19, -24<=l<=24                                                          |
| Reflections collected / unique    | 29796 / 9092 [R(int) = 0.0522]                                                              |
| Completeness to θ = 25.00         | 99.8 %                                                                                      |
| Max. and min. transmission        | 0.9924 and 0.9857                                                                           |
| Refinement method                 | Full-matrix least-squares on F <sup>2</sup>                                                 |
| Data / restraints / parameters    | 9092 / 884 / 777                                                                            |
| Goodness-of-fit on F <sup>2</sup> | 1.256                                                                                       |
| Final R indices [I>2σ(I)]         | R1 = 0.1007, wR <sub>2</sub> = 0.3103                                                       |
| R indices (all data)              | R1 = 0.1330, wR <sub>2</sub> = 0.3511                                                       |
| Extinction coefficient            | 0.0014(10)                                                                                  |
| Largest diff. peak and hole       | 1.161 and -0.842 e.Å <sup>-3</sup>                                                          |

---

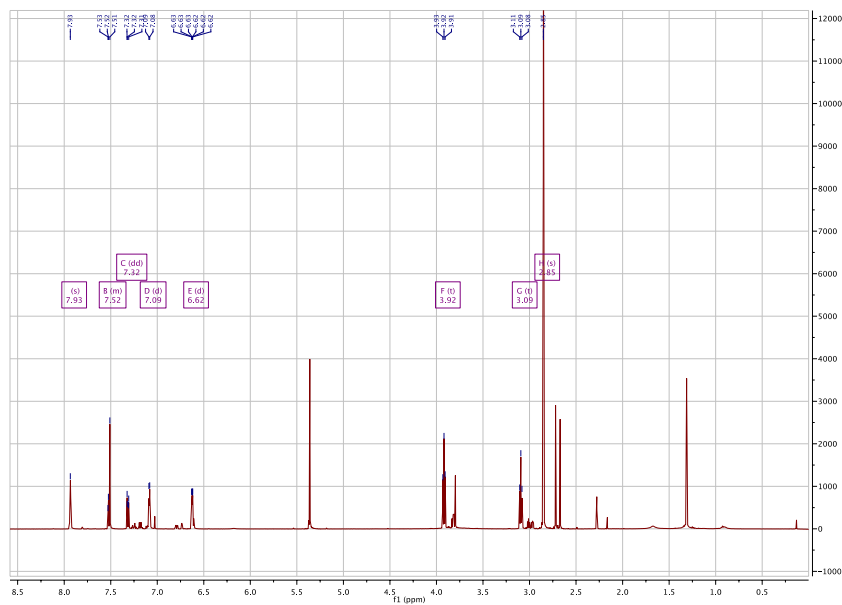

Figure S-3.  $^1\text{H}$  NMR spectrum of compound **1** in  $\text{CD}_2\text{Cl}_2$ .

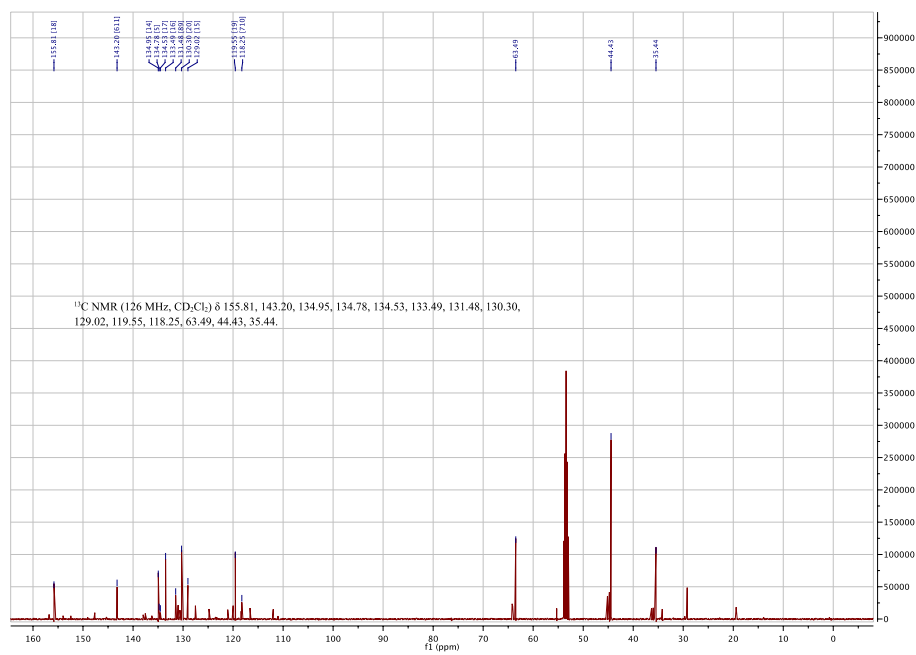

Figure S-4.  $^{13}\text{C}$  NMR spectrum of compound **1** in  $\text{CD}_2\text{Cl}_2$ .

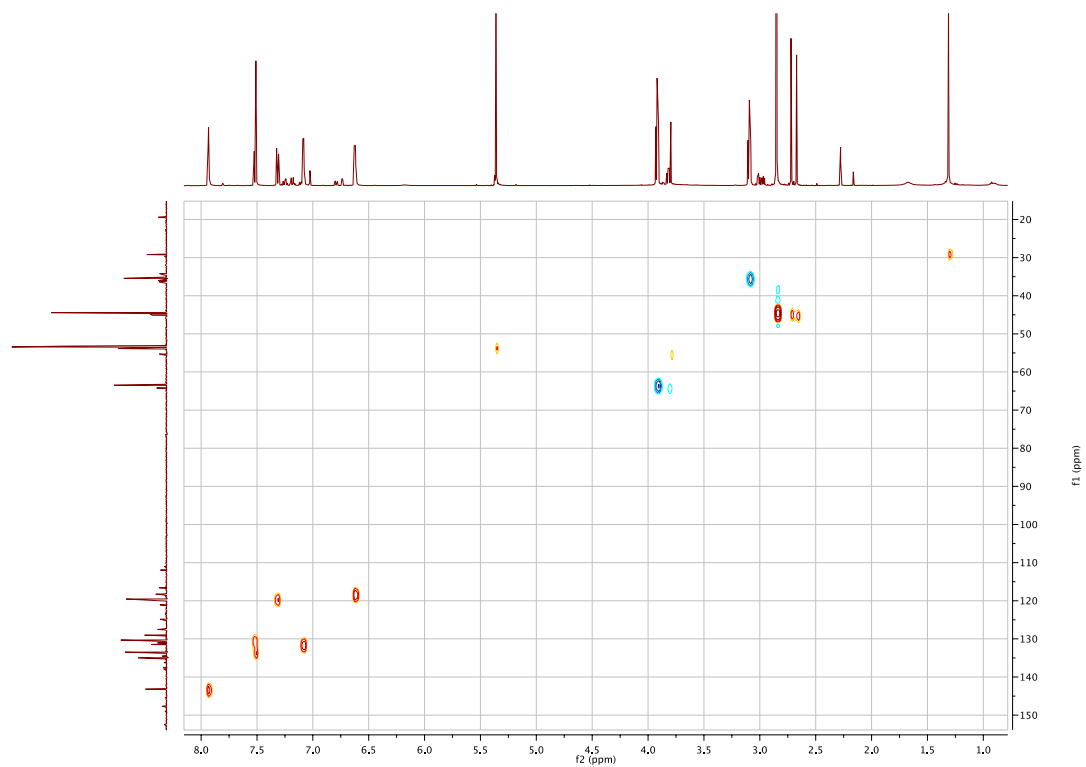

**Figure S-5.** HSQC spectrum of compound **1** in CD<sub>2</sub>Cl<sub>2</sub>.

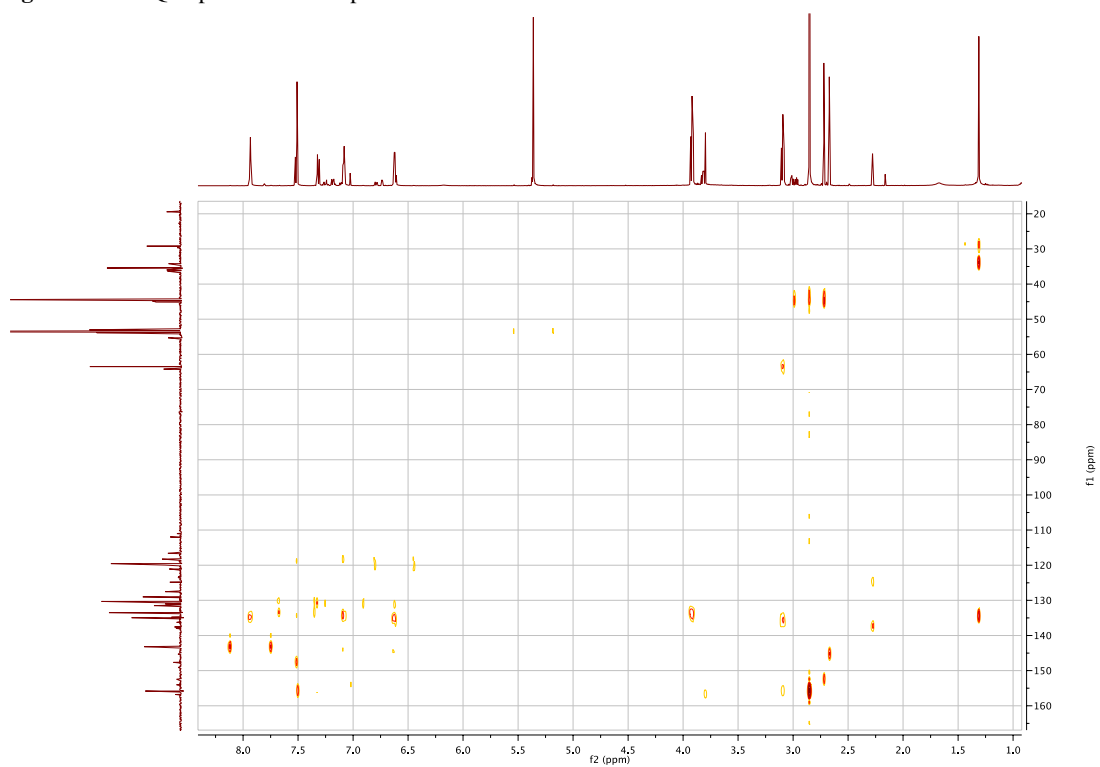

**Figure S-6.** HMBC spectrum of compound **1** in CD<sub>2</sub>Cl<sub>2</sub>.



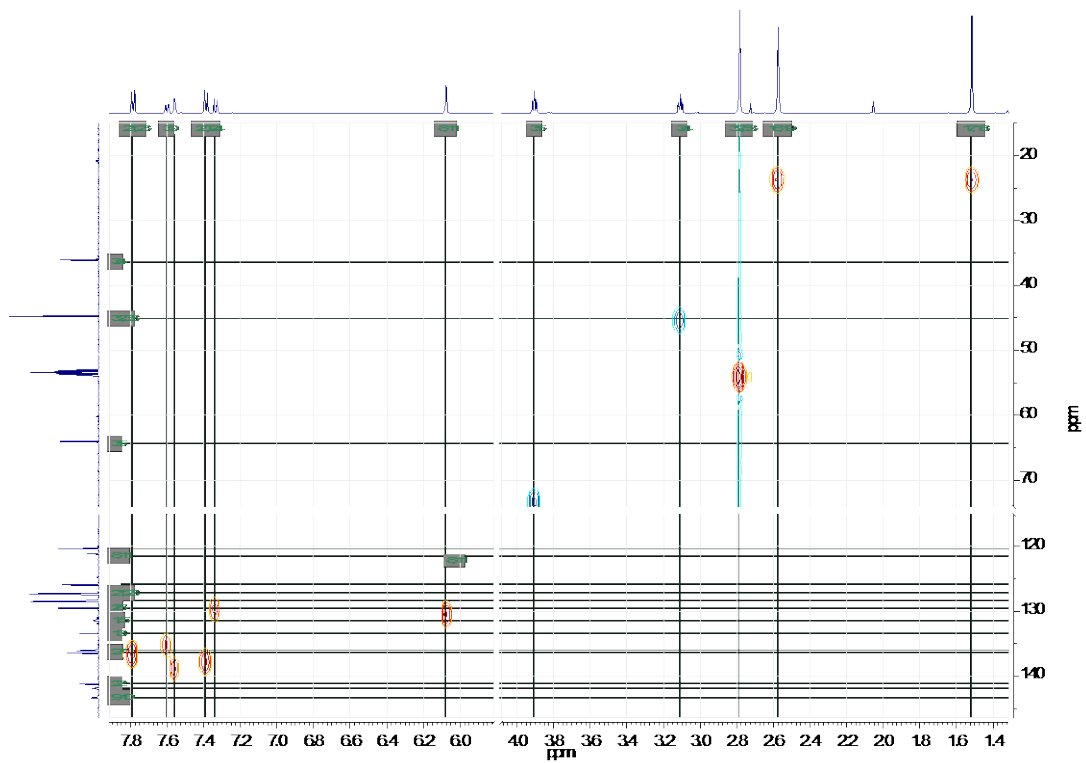

Figure S-9. HSQC spectrum of compound **2** in CD<sub>2</sub>Cl<sub>2</sub>.

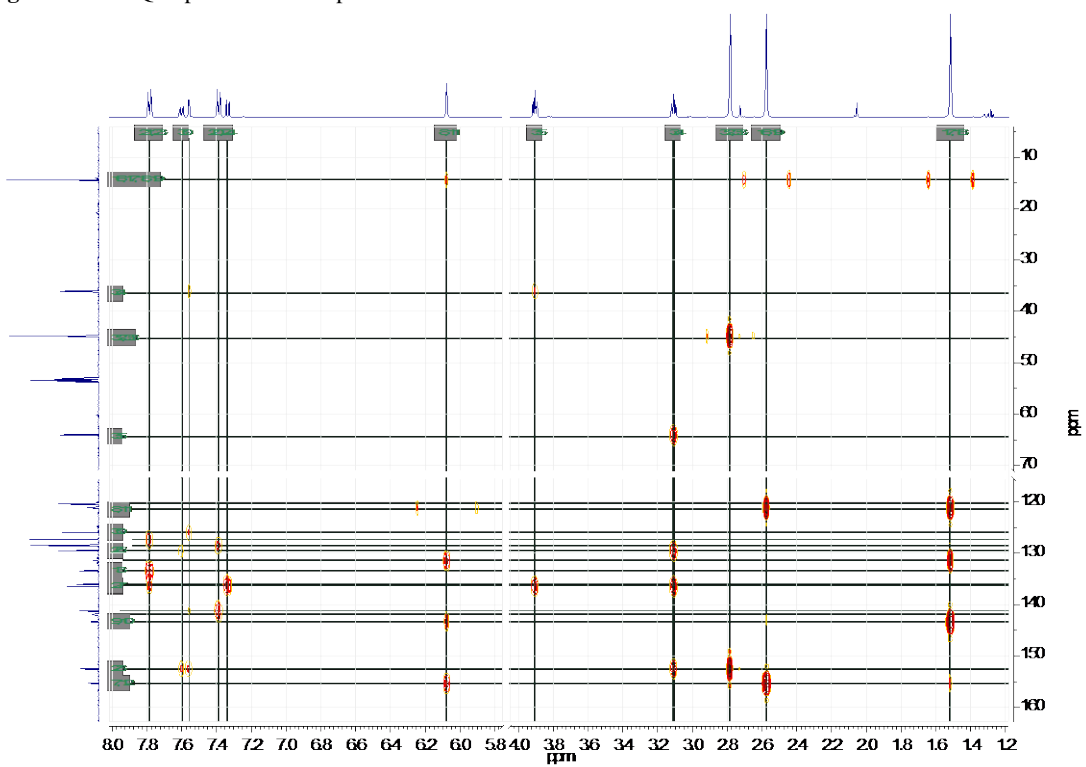

Figure S-10. HMBC spectrum of compound **2** in CD<sub>2</sub>Cl<sub>2</sub>.

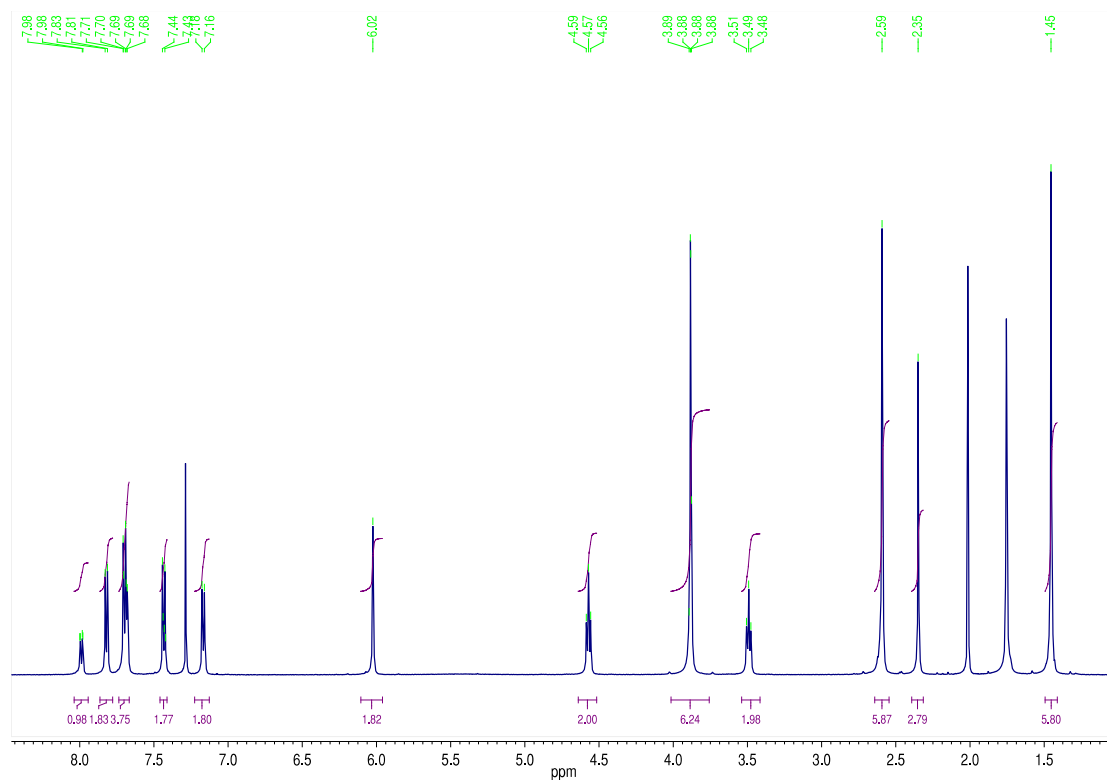

Figure S-11.  $^1\text{H}$  NMR spectrum of compound **8** in  $\text{CDCl}_3$ .

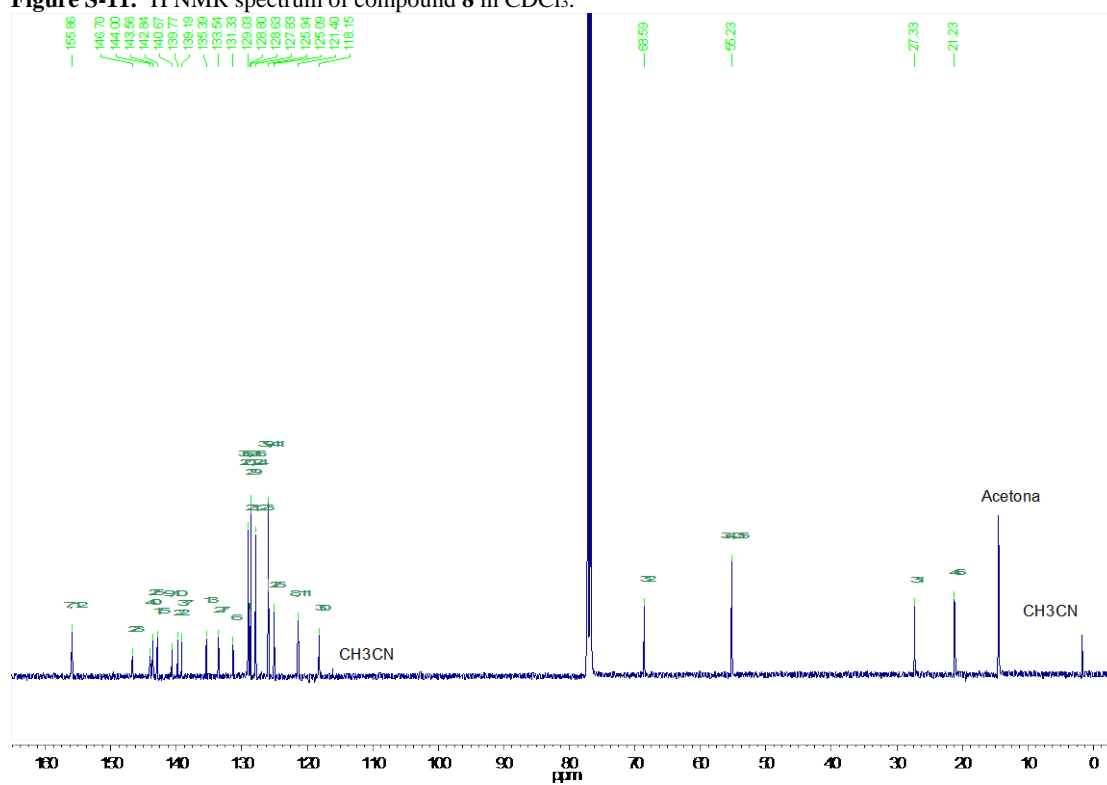

Figure S-12.  $^{13}\text{C}$  NMR spectrum of compound **8** in  $\text{CDCl}_3$ .

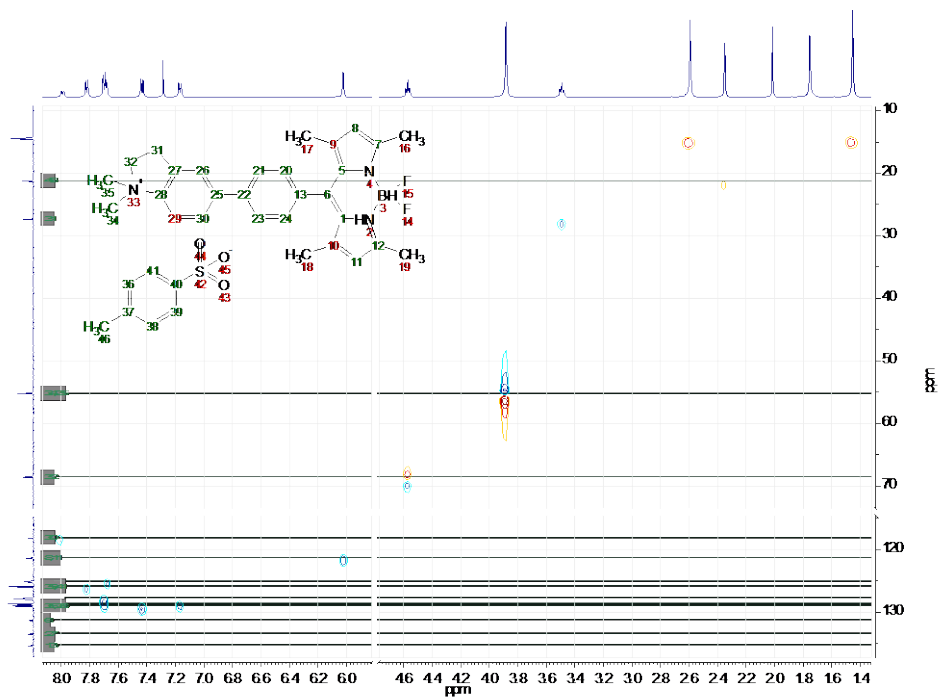

Figure S-13. HSQC NMR spectrum of compound **8** in CDCl<sub>3</sub>.

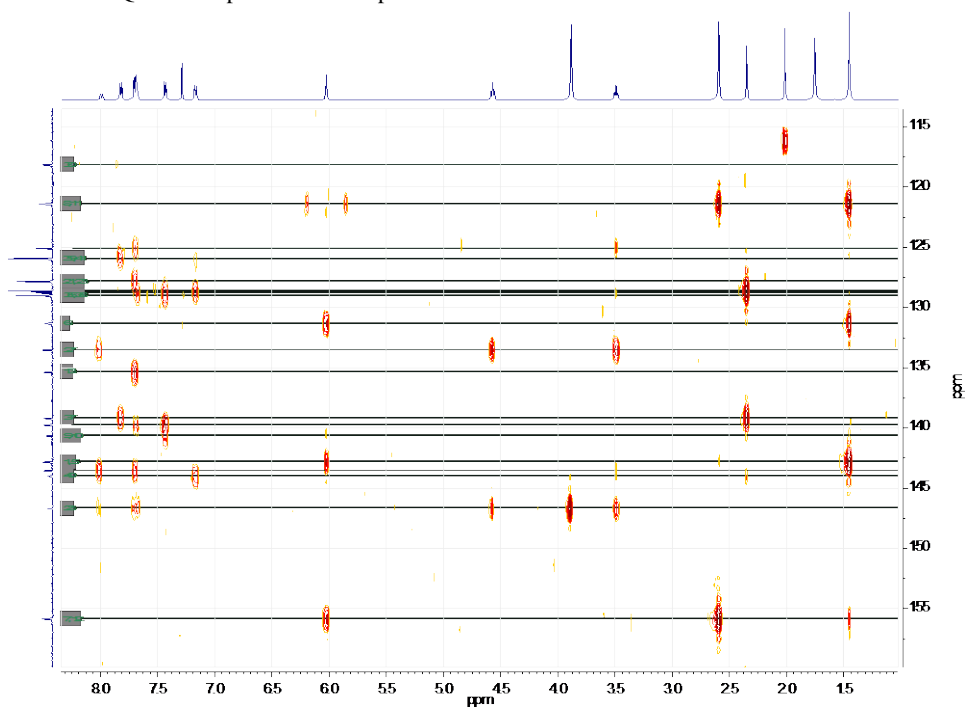

Figure S-14. HMBC NMR spectrum of compound **8** in CDCl<sub>3</sub>.



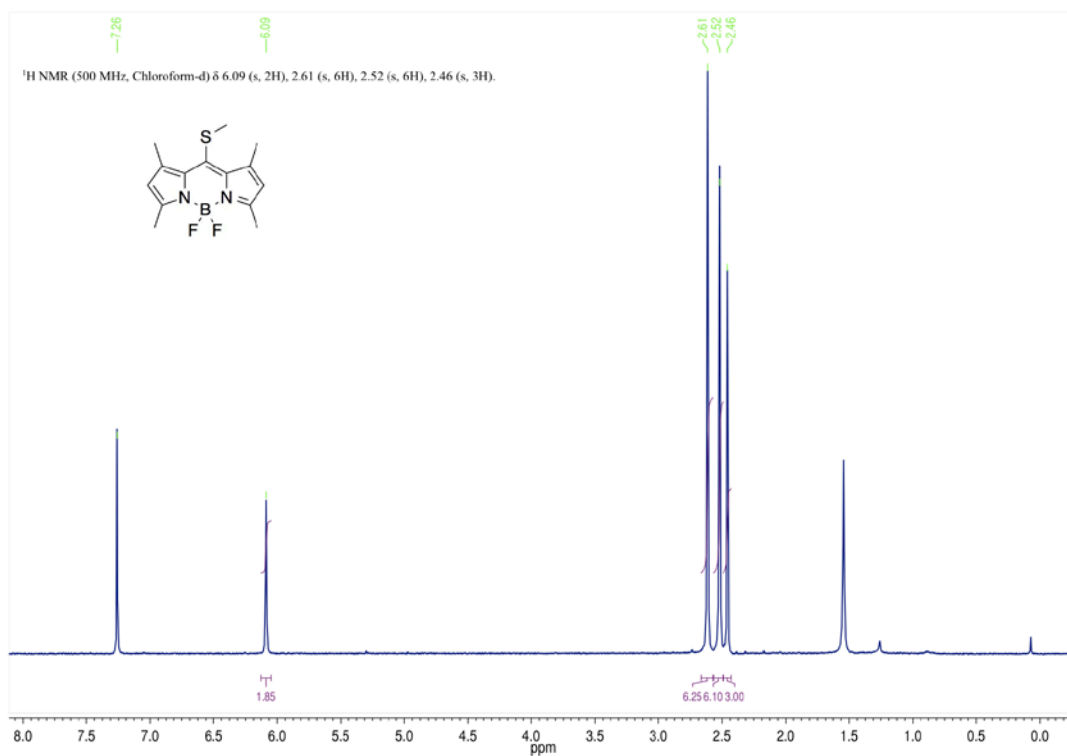

**Figure S-15.** <sup>1</sup>H NMR spectrum of tetramethylated derivative of **4** in CDCl<sub>3</sub>.

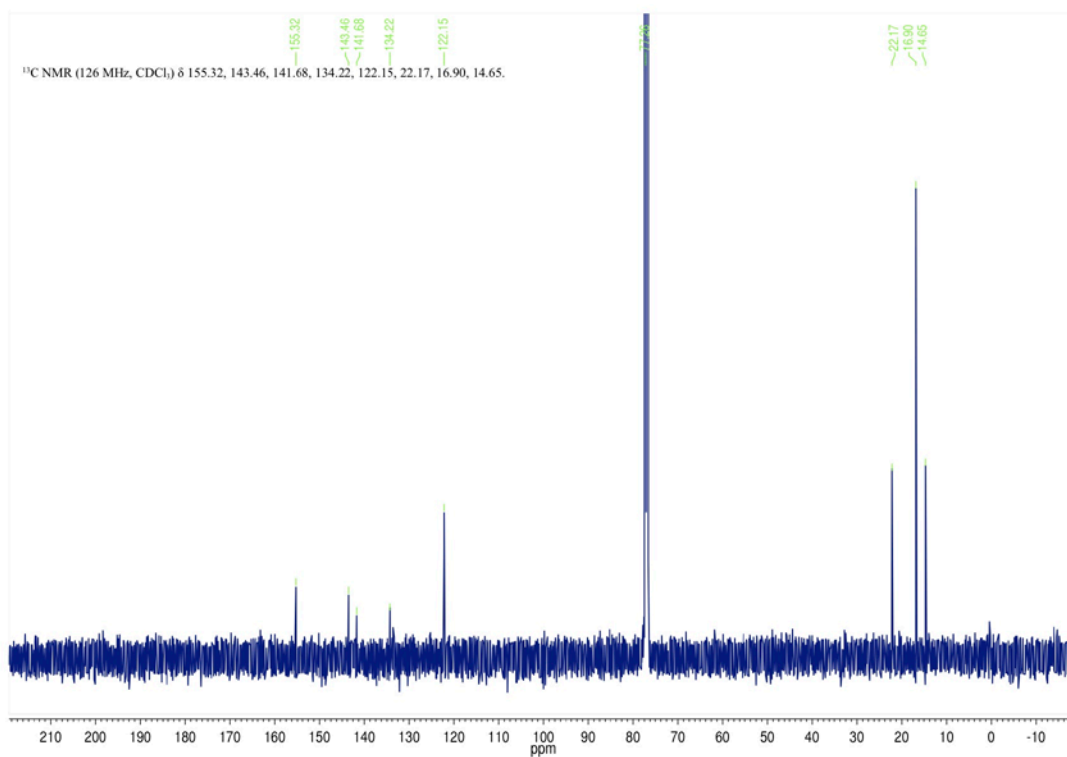

**Figure S-16.** <sup>13</sup>C NMR spectrum of tetramethylated derivative of **4** in CDCl<sub>3</sub>.

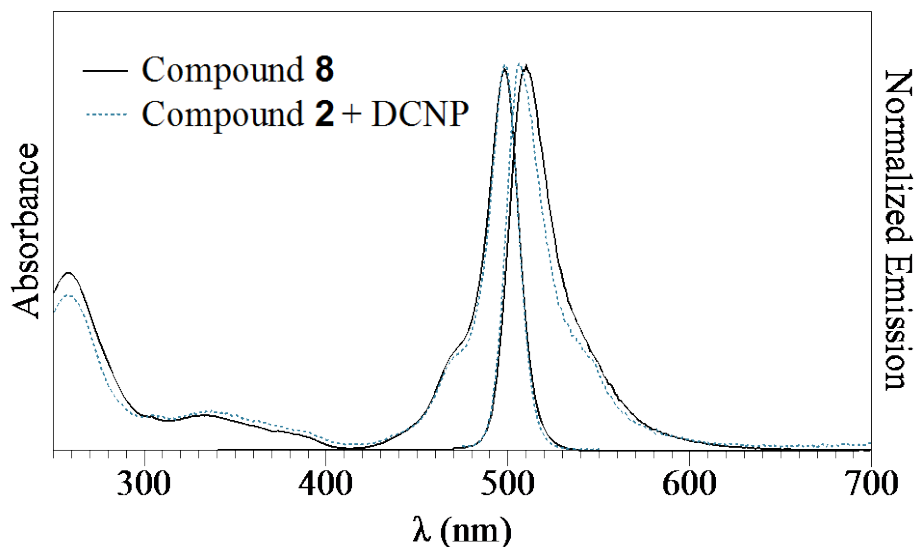

**Figure S-17.** Absorption and emission spectra of compound **8**  $10^{-6}$  M in MeCN (Black line). Absorption and emission spectra of compound **2** + DCNP 20 mM (Blue dotted lines) are included for comparison purposes.

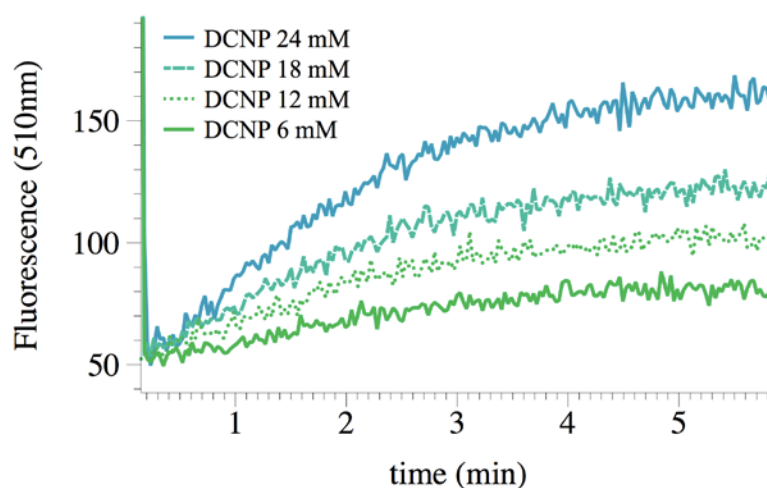

**Figure S-18.** Kinetic profile of the emission intensity at 510 nm of probe **1** after the addition of 6, 12, 18 and 24 mM DCNP. Probe **1** is  $10^{-6}$  M in pH=5.5 buffered water/acetonitrile 3:1 v/v mixture.

## Notes

<sup>a</sup>Centro de Reconocimiento Molecular y Desarrollo Tecnológico (IDM), Universidad de Valencia, Doctor Moliner 50 46100 Burjassot, Valencia (Spain) Fax: (+34) 963543831. E-mail: [Ana.Costero@uv.es](mailto:Ana.Costero@uv.es)

<sup>b</sup>Centro de Reconocimiento Molecular y Desarrollo Tecnológico, Unidad Mixta Universidad de Valencia - Universidad Politécnica de Valencia, Departamento de Geología, Facultad de Ciencias Biológicas, Universidad de Valencia, Doctor Moliner 50, 46100 Burjassot, Valencia, Spain

<sup>c</sup>Centro de Reconocimiento Molecular y Desarrollo Tecnológico, Unidad Mixta Universidad Politécnica de Valencia - Universidad de Valencia Departamento de Química, Universidad Politécnica de Valencia Camino de Vera s/n, 46022, Valencia (Spain)
